RESEARCH ARTICLE

# Mitochondrial DNA Analyses Indicate High Diversity, Expansive Population Growth and High Genetic Connectivity of Vent Copepods (Dirivultidae) across Different Oceans

Sabine Gollner<sup>1,2</sup>\*, Heiko Stuckas<sup>3</sup>, Terue C. Kihara<sup>1</sup>, Stefan Laurent<sup>4,5</sup>, Sahar Kodami<sup>1</sup>, Pedro Martinez Arbizu<sup>1</sup>

**1** German Center for Marine Biodiversity Research (DZMB), Senckenberg am Meer, Wilhelmshaven, Germany, **2** Royal Netherlands Institute for Sea Research (NIOZ), Ocean Systems Sciences (OCS), 't Horntje, Texel, The Netherlands, **3** Senckenberg Natural History Collections Dresden, Museum of Zoology, Dresden, Germany, **4** School of Life Sciences, École Polytechnique Fédérale de Lausanne (EPFL), Lausanne, Switzerland, **5** Swiss Institute of Bioinformatics (SIB), Lausanne, Switzerland

\* These authors contributed equally to this work.

\* [sabine.gollner@senckenberg.de](mailto:sabine.gollner@senckenberg.de)

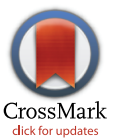

CrossMark  
click for updates

## OPEN ACCESS

**Citation:** Gollner S, Stuckas H, Kihara TC, Laurent S, Kodami S, Martinez Arbizu P (2016) Mitochondrial DNA Analyses Indicate High Diversity, Expansive Population Growth and High Genetic Connectivity of Vent Copepods (Dirivultidae) across Different Oceans. PLoS ONE 11(10): e0163776. doi:10.1371/journal.pone.0163776

**Editor:** Sébastien Duperron, UPMC, FRANCE

**Received:** June 10, 2016

**Accepted:** September 5, 2016

**Published:** October 12, 2016

**Copyright:** © 2016 Gollner et al. This is an open access article distributed under the terms of the [Creative Commons Attribution License](https://creativecommons.org/licenses/by/4.0/), which permits unrestricted use, distribution, and reproduction in any medium, provided the original author and source are credited.

**Data Availability Statement:** All relevant data are within the paper and its Supporting Information files. All mtCOI files are available from the Genbank database (see Supplement [S1 Table](#) for Genbank accession numbers).

**Funding:** The project received funding from the European Union Seventh Framework Programme (FP7/2007-2013) under the MIDAS project, Grant agreement no. 603418.

## Abstract

Communities in spatially fragmented deep-sea hydrothermal vents rich in polymetallic sulfides could soon face major disturbance events due to deep-sea mineral mining, such that unraveling patterns of gene flow between hydrothermal vent populations will be an important step in the development of conservation policies. Indeed, the time required by deep-sea populations to recover following habitat perturbations depends both on the direction of gene flow and the number of migrants available for re-colonization after disturbance. In this study we compare nine dirivultid copepod species across various geological settings. We analyze partial nucleotide sequences of the mtCOI gene and use divergence estimates ( $F_{ST}$ ) and haplotype networks to infer intraspecific population connectivity between vent sites. Furthermore, we evaluate contrasting scenarios of demographic population expansion/decline versus constant population size (using, for example, Tajima's D). Our results indicate high diversity, population expansion and high connectivity of all copepod populations in all oceans. For example, haplotype diversity values range from 0.89 to 1 and  $F_{ST}$  values range from 0.001 to 0.11 for *Stygiopontius* species from the Central Indian Ridge, Mid Atlantic Ridge, East Pacific Rise, and Eastern Lau Spreading Center. We suggest that great abundance and high site occupancy by these species favor high genetic diversity. Two scenarios both showed similarly high connectivity: fast spreading centers with little distance between vent fields and slow spreading centers with greater distance between fields. This unexpected result may be due to some distinct frequency of natural disturbance events, or to aspects of individual life histories that affect realized rates of dispersal. However, our statistical performance analyses showed that at least 100 genomic regions should be sequenced to ensure accurate estimates of migration rate. Our demography parameters

**Competing Interests:** The authors have declared that no competing interests exist.

demonstrate that dirivultid populations are generally large and continuously undergoing population growth. Benthic and pelagic species abundance data support these findings.

## Introduction

Deep-sea hydrothermal vents are island habitats that occur globally along mid-ocean ridges, back-arc basins and island arcs. Tectonic events and volcanic eruptions make them unstable in space and time. The emergence of hot, sulfide- and mineral-rich hydrothermal fluids also characterizes this extreme ecosystem. Most vent macrofauna and several meiofauna species are restricted to the vent environment, where the sulfide-rich fluids nourish chemolithoautotrophic bacteria [1–3]. These bacteria form, as free-living communities or in symbiosis with macrofauna, the basis of the food-chain of a highly specialized, abundant, biomass rich but species poor vent community [4].

The rich sulfide mineral deposits at deep-sea hydrothermal vents could make this unique ecosystem a target area for the mining industry in the near future [5]. Seabed crawlers utilized in this industry use cutters to shred mineral deposits, resulting in large scale disturbances on the faunal communities living at hydrothermal vents [6]. Direct impacts include killing of fauna as well as removal of substrate and associated habitat modification (i.e. topography) and fragmentation [7, 8]. Conservation policies depend on predictions as to whether species have the potential to recolonize impacted areas and, hence, contribute to the recovery of communities after such major disturbance events.

Genetic analyses of so far undisturbed populations can greatly enhance our understanding of vent species population biology, and can allow predictions of recolonization and recovery. Recolonization potential can be described using the conceptual framework of population connectivity, a concept that describes the extent to what subpopulations exchange migrants. While a direct assessment of migration rates requires model-based demographic analyses of population genomic datasets [9–11], divergence indices (e.g.  $F_{ST}$  values) can provide indirect estimates of the extent to which the evolution of subpopulations is influenced by migration (genetic connectivity) [12]. In the context of conservation policies, genetic connectivity estimates can be complemented by assessments of genetic diversity and demographic characteristics. The combination of these different population genetic estimates allows characterization of putatively connected subpopulations with respect to their population size, their potential for adaptation under changing environmental conditions [13] and their propensity for expansive/restrictive population growth.

Genetic analyses have been previously applied for various macrofaunal and megafaunal species representing different superordinate taxa (e.g. Crustacea, Bivalvia, Gastropoda, Polychaeta) in distinct geographical settings, including the Mid Atlantic Ridge, East Pacific Rise, Eastern Lau Spreading Centre, and Central Indian Ridge [14]. These studies indicated that migration capability and gene flow between subpopulations of species is high [15–17]. However, though there are also some examples of pronounced genetic differentiation between subpopulations resulting from restricted gene flow, these examples often occur between geographically separated vent areas such as the Northern and Southern East Pacific Rise [18, 19]. In addition, there is also a general pattern of high intrapopulation genetic diversity and expansive population growth among various species from different vent sites [16, 20].

The underlying mechanisms of high connectivity (migration capability), high genetic diversity and expansive population growth across different species and taxa are not fully understood.

On one hand, life history traits must play an important role, since they allow for rapid population growth and/or guarantee long-term planktonic larval duration as connectivity between invertebrate populations is often achieved by passive larval drift. On the other hand, passive larval drift is influenced by abiotic characteristics such as plume height or ocean currents [21]. Furthermore, the rate of exchange of individuals between vent fields is also likely influenced by vent field frequency and thus distance between single vent sites. Finally, major natural disturbance events such as volcanic eruptions can totally wipe out local populations [22–24], affecting population size and in turn exchange of individuals among populations [25].

Volcanic eruption and vent field frequency differ among hydrothermal vents at distinct spreading centers along mid-ocean ridges, back-arc basins and at volcanic arcs. Vent field frequency increases with increased spreading rate [26]. At the fast-spreading Eastern Lau Spreading Center (ELSC), the rate of spreading is 64 mm/yr and vent field frequency is ~8 per 100 km. On fast-spreading mid-ocean ridge at 9°N East Pacific Rise (EPR), the spreading rate is 98 mm/yr and vent field frequency is about 4 per 100 km. In contrast, on the slow-spreading Central Indian Ridge (CIR) (e.g., 42 mm/yr at 25°S) and on the Mid-Atlantic Ridge (MAR) (e.g., 23 mm/yr at 27°N), less than one vent field is present per 100 km [26]. The steady state assumption suggests frequent eruption intervals of ~10 years for fast-spreading ridges, and infrequent eruption intervals of ~1000 years or more for slow-spreading ridges [27]. As an example, at the 9°N EPR, two major volcanic eruptions have been documented in the last three decades—one in 1991 and the next in 2005/06 [28, 29]. Both eruptions killed the vast majority of animals in this area [22, 23, 30].

Disentangling to what extent geographic and geologic characteristics of vent fields (e.g., vent distance or frequency of volcanic eruption) can shape population genetic structure of invertebrate species, such as diversity, demography, connectivity, is indeed important for conservation plans; however, this remains challenging, not in the least because endemism level per biogeographic province among vent macrofauna species is typically high (95%) and no vent species occurs circumglobally [31]. If such circumglobally existing species were available for investigation, comparative analyses could reveal how different geological and geographical vent field characteristics shape population structure under given species-specific life history traits. However, this concept further assumes comparable population histories in each biogeographic province.

In the absence of a circumglobally occurring model species that allow analyses of population structure at different vent regions, this study instead comparatively explores patterns of genetic diversity, demography, and divergence in populations of very closely related copepod species with similar life history traits across different oceans. We investigate nine species belonging to two genera within the vent endemic family Dirivultidae, a taxon with more than 50 described species. Dirivultidae is the one of the most species-rich invertebrate family at hydrothermal vents [32]. They are an important part of all vent communities and in the most extreme habitats, such as sulfide chimneys colonized by Pompeii worms (*Alvinella pompejana*), they are the most abundant animals. They are typically free-living among aggregations of foundation species such as Pompeii worms, tubeworms, snails, or bivalves [33, 34]. Some genera such as *Stygiopontius* and *Aphotopontius* occur at vents worldwide [35]; they typically have 4 eggs from which lecithotrophic nauplii hatch [36, 37]. Nauplii and copepodites have been observed in the pelagial above vents and also on the benthos [22, 38].

We have selected 9 dirivultid species from two genera from four areas: fast-spreading Eastern Lau Spreading Center (ELSC) and East Pacific Rise (9°N EPR), and slow-spreading Mid Atlantic Ridge (MAR 23°N, 26°N, 4°S), and Central Indian Ridge (CIR). We morphologically identify the species and use partial nucleotide sequences of the mitochondrial gene Cytochrome Oxidase I (mtCOI; ~650 bp) to estimate genetic diversity and demographic

characteristics within populations. In addition, divergence between subpopulations is assessed to provide an estimate of genetic connectivity, i.e., describing to what extent gene flow affects evolutionary processes within populations. We further link genetic data to species abundance data in the benthos and in the pelagial, to the end of discussing our genetic results in the light of actual species population size and dispersal potential. Our analyses provide a basis for discussing whether the frequencies of vent fields and volcanic eruptions can shape the genetic composition of populations. Furthermore, based on observed population genetic patterns in dirivultid species in different oceans, we carry out statistical performance analyses and lay out a conceptual basis for future population genomic surveys in these populations. Finally, we use our data to estimate potential mining impact on this faunal group.

## Material and Methods

### Study areas, sampling, and sample processing

Copepod specimens were collected by the submersible *Alvin* on the East Pacific Rise (EPR) and the Guaymas Basin (GB) in the East Pacific, by the submersible *Nautile* on the Mid-Atlantic Ridge (MAR) in the Atlantic, by the ROV Jason the Eastern Lau Spreading Center (ELSC) in the West Pacific, and by the ROV Kiel 6000 on the Central Indian Ridge (CIR) in the Indian Ocean (Fig 1). All samples were taken in international waters, and did not contain any endangered species.

A map of the sites was created using GeoMapApp (<http://www.geomapapp.org>; version 3.6.2) and the interactive map from the interridge data base (<http://vents-data.interridge.org/maps>). Information on dive number, longitude, latitude and depth of sites where specimens were collected, as well as inter-site distances, is provided in Table 1.

To obtain copepods, entire faunal aggregations were collected using different instruments such as mussel pots, slurp guns, or grabs by the submersibles' or robots' arms. After collection, faunal aggregations were put into isolated plastic boxes on the submersible/ROV and transported to the research vessel on the surface. Onboard the ships, samples were sieved over a 32 micrometer and 1 mm net successively to separate the meio- from the macrofauna. Live observation of copepods and other meiofauna under a dissecting microscope onboard the ship revealed that most animals collected were still alive. Meiofauna were immediately fixed in 99.5% EtOH. Back in the lab, meiofauna were sorted under a dissecting microscope to isolate the dirivultid copepods.

In this study, we morphologically identified and produced new sequences from the following species: *Stygiopontius* sp. nov. 1, *S.* sp. nov. 2, and *Aphotopontius* sp. nov. 1 from CIR, *S. pectinatus* from MAR, and *A. limatulus* and *A. mammillatus* from EPR (total 85 sequences; Table 1, S1 Table). In addition, we also include our priorly published mtCOI sequences for *S. lauensis* and *S. brevispina* (all ELSC), and for *S. hispidulus* (EPR) from Gollner et al. (2011) [39] (total 201 sequences; Table 1, S1 Table). Sample processing, morphological taxonomy, DNA isolation, PCR and sequencing were the same for the new and the previously-published specimens.

### Morphological Taxonomy

All specimens were morphologically identified to species level using the original species descriptions and a key to identify dirivultid copepod species [35]. Single individuals were put on glass slides in a small chamber filled with 99.5% EtOH and covered with a cover glass to reduce evaporation. In total, we used 286 specimens from 9 species in our study (Table 1). Three of the nine species are new to science: *Stygiopontius* sp. nov. 1, *S.* sp. nov. 2 and

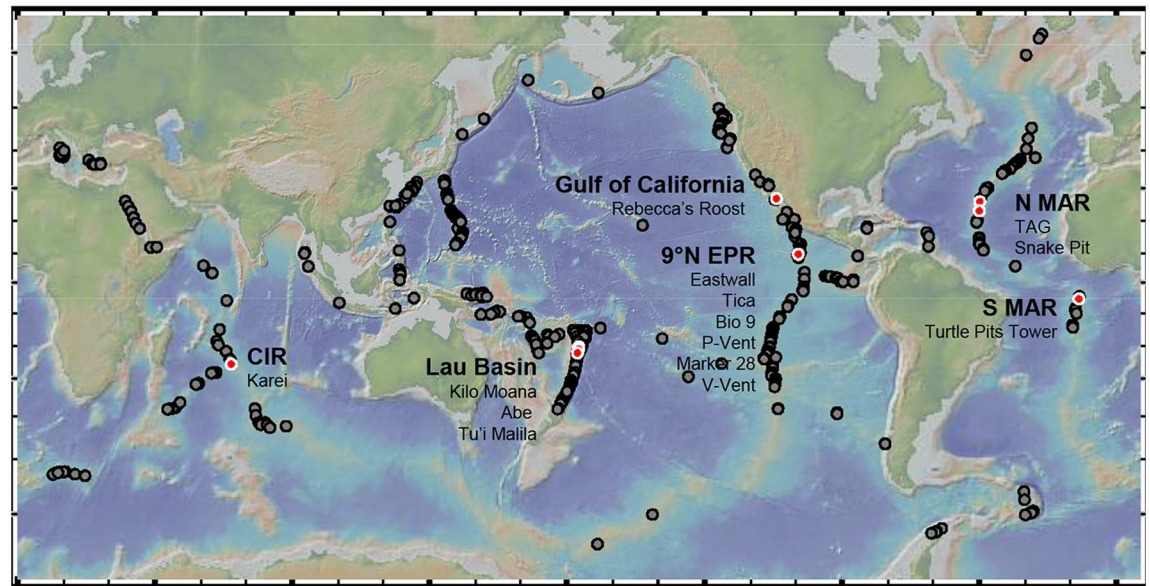

**Fig 1. World map showing as grey circles vent sites under investigation during the last decades and as red circles vent sites we considered for this study.** Name of studied biogeographic regions (in bold) and vent sites (listed from North to South) are given (CIR—Central Indian Ridge, EPR—East Pacific Rise, MAR—Mid Atlantic Ridge).

doi:10.1371/journal.pone.0163776.g001

*Aphotopontius* sp. nov. 1 from the CIR (Fig 2). The new species will be morphologically described by Terue C. Kihara (in. prep.) and are presented in the Catalogue of INDEX [40]

## DNA isolation, PCR, and sequencing

The same animals that were morphologically identified were used for our mtCOI study. We applied the same methods for all specimens, published sequences and newly analyzed specimens alike. DNA was extracted from single specimens in 40 microliters of chelex (InstaGene Matrix, Bio-Rad) or 100 microl DNeasy Tissue Extraction Kit (QIAGEN, Hilden, Germany). We discovered no difference in PCR amplification success rate between these two extraction methods. Partial cytochrome c oxidase subunit I (mtCOI) was PCR-amplified using universal primers LCOI (50–GGT CAA CAA ATC ATA AAG ATA TTG G–30) and HCOI (50–TAA ACT TCA GGG TGA CCA AAA AAT CA–30) [41] and GE Healthcare Illustra Pure Taq PCR beads. The mix for one individual consisted of 0.5 microl LCOI, 0.5 microl HCOI, 20 microl distilled H<sub>2</sub>O, and 4 microl of the DNA extract. Cycle conditions were 95°C for 5 min, 40 cycles at 95°C for 30 seconds, 42°C for 1 min, and 72°C for 1 min, and a final extension step at 72°C for 7 min. DNA was sent to Macrogen for Sanger-sequencing. Newly generated COI-sequences were manually quality controlled and clipped using BioEdit [42] and Chromas v2.23 (available at <http://www.technelysium.com.au>). Contaminations were extracted using BLAST against a non-copepod COI sequence database. Contig assembly of forward and reverse reads was completed using the Cap-Contig assembly function in BioEdit. All GenBank accession numbers, including newly generated and published ones from Gollner et al. [39] are given in S1 Table.

## Molecular taxonomy

The dataset used was a combination of the newly produced sequences and those from Gollner et al. 2011 [39]. Species specific codon-based nucleotide alignments for mtCOI were created using the software TranslatorX [43]. We used muscle [44] as an alignment algorithm, the

**Table 1. Dive number, details on study sites (biogeographical region, latitude (lat), longitude (long), depth (in m), site name, inter-site distances (dist.), and number of analyzed individuals per copepod species.**

| Dive              | region | lat     | long     | depth (m) | site              | dist. (km) | S. h.   | S. l.   | S. b. | S. sp. nov. 1 | S. sp. nov. 2 | S. p.   | A. l. | A. m.   | A. sp. nov. 1 |
|-------------------|--------|---------|----------|-----------|-------------------|------------|---------|---------|-------|---------------|---------------|---------|-------|---------|---------------|
| AD 4457           | GC     | 27°00'N | 111°24'W | 2000      | Rebecca's Roost   |            | 1       |         |       |               |               |         |       |         |               |
| AD 4580           | EPR    | 9°51'N  | 104°18'W | 2500      | Eastwall          | 1903,3     |         |         |       |               |               |         | 4     | 4       |               |
| AD 4261 & AD 4580 | EPR    | 9°50'N  | 104°17'W | 2509      | Tica              | 0,3        | 7       |         |       |               |               |         |       | 11 (10) |               |
| AD 4266           | EPR    | 9°50'N  | 104°17'W | 2508      | Bio 9             | 0,2        | 34 (32) |         |       |               |               |         |       |         |               |
| AD 4575           | EPR    | 9°50'N  | 104°17'W | 2508      | P-Vent            | 0,1        |         |         |       |               |               |         | 1     |         |               |
| AD 4465           | EPR    | 9°50'N  | 104°17'W | 2507      | Marker 28         | 0,2        | 16      |         |       |               |               |         |       |         |               |
| AD 4368           | EPR    | 9°47'N  | 104°17'W | 2509      | V-Vent            | 5,5        | 27      |         |       |               |               |         |       |         |               |
| J2#424 & J2#433   | ELSC   | 20°03'S | 176°08'W | 2614      | Kilo Moana        |            |         | 7       | 8     |               |               |         |       |         |               |
| J2#425 & J2#426   | ELSC   | 20°46'S | 177°11'W | 2145      | ABE               | 78,8       |         | 50      | 1     |               |               |         |       |         |               |
| J2#428 & J2#430   | ELSC   | 21°59'S | 176°34'W | 1885      | Tu'i Malila       | 141,2      |         | 24 (23) | 26    |               |               |         |       |         |               |
| BICOSE—12–575     | MAR    | 26°07'N | 44°49'W  | 3620      | TAG               |            |         |         |       |               |               | 19 (18) |       |         |               |
| BICOSE—05–568     | MAR    | 23°22'N | 44°57'W  | 3450      | Snake Pit         | 306,6      |         |         |       |               |               | 17 (15) |       |         |               |
| M64/1             | MAR    | 4°48'S  | 12°21'W  | 2992      | Turtle Pits Tower | 6890,8     |         |         |       |               |               | 2       |       |         |               |
| INDEX13—31ROV     | CIR    | 25°19'S | 70°02'E  | 2527      | Karei             |            |         |         |       |               |               |         |       |         | 1             |
| INDEX13—35ROV     | CIR    | 25°19'S | 70°02'E  | 2379      | Karei             |            |         |         |       | 17            | 4             |         |       |         | 5             |

In case some of the gained sequences were too short or had too many ambiguities to apply population genetics, number of sequences used for population genetics is given in brackets. Sites are listed from North to South, and inter-site distance to next site is given in km. Region: EPR—East Pacific Rise, GC—Gulf of California (Guaymas Basin), ELSC—Eastern Lau Spreading Center (Lau Basin), MAR—Mid Atlantic Ridge, CIR—Central Indian Ridge; Species: S. h.—*Stygiopontius hispidulus*, S. l.—*S. lauensis*, S. b.—*S. brevispina*, S. sp. nov. 1, S. sp. nov. 2, S. p.—*S. pectinatus*. 1, A. l.—*Aphotopontius limatulus*, A. m.—*A. mammillatus*, A. sp. nov. 1.

doi:10.1371/journal.pone.0163776.t001

translation table for invertebrate mitochondria, and allowed reading frame identification for each nucleotide sequence separately. This approach allows selecting sequences with protein coding open reading frames and excluding those with frame shift mutations or unexpected stop codons, i.e., sequences that may arise from nuclear mitochondrial insertions (NUMT). Species specific alignments were combined and subsequently used for phylogenetic inference with software RAxML (Maximum-likelihood method, 1000 fast bootstrap repeats, GTR-GAMMA as evolutionary model). Species from harpacticoid copepods were used as outgroup (*Ameira* species). Species-specific alignments were then used to estimate p-distances between COI nucleotide sequences using the software MEGA 5.1 [45]. This was done for within-taxon divergence estimates based on i) pairwise p-distances between COI nucleotide sequences of each specimen and ii) average within group standard error obtained using 500-bootstrap replicates. Similarly, between-taxon average p-distances were calculated using the same software package and using 500 bootstrap replicates to obtain standard error. The same alignments were used to infer haplotype networks using popart (<http://popart.otago.ac.nz>) and the statistical parsimony network implementation that uses TCS [46, 47]. Popart depicts not only

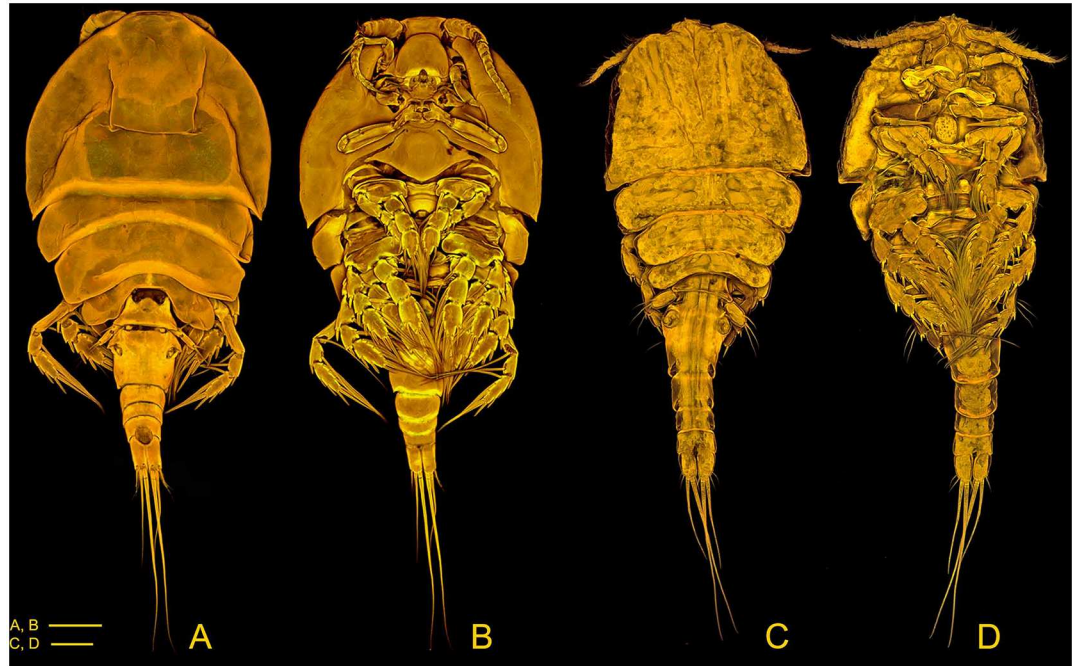

**Fig 2. Confocal laser scanning microscopy of dirivulitid copepods.** Maximum projections. *Aphotopontius* sp. nov. 1 Female A. habitus, dorsal; B. habitus, ventral. *Stygiopontius* sp. nov. 1 Female C. habitus, dorsal; D. habitus, ventral. Scale bars = 100  $\mu$ m.

doi:10.1371/journal.pone.0163776.g002

phylogenetic relationships but also haplotype frequencies origins, facilitating tests for haplotype sharing between different localities.

### Population genetics

Population specific parameters reflecting diversity and demography at the mtCOI gene were estimated using the software DnaSPv5 [48] for populations with at least 4 specimens. Population diversity is described mainly by haplotype diversity ( $H_d$ ) and nucleotide diversity ( $\pi$ ) [49]. Haplotype diversity describes the chance to observe two different haplotypes when randomly sampling two specimens from a population. Thus, the parameter ranges from 0 (one haplotype is fixed) to 1 (every specimen has a different haplotype). Similarly, nucleotide diversity describes the chances of observing two different nucleotides at a given COI sequence position when randomly sampling two specimens. This indicates the extent to which haplotypes within a population differ in their nucleotide composition. We also present the ratio between nucleotide diversity at non-synonymous ( $\pi_a$ ) and synonymous ( $\pi_s$ ) sites.

Demographic history of populations was analyzed using the software DnaSPv5 [48] to estimate the parameters TajimaD, FuFs, R2 and the raggedness index. With these estimates, we could test the hypothesis of expansive population growth. The parallel and comparative analyses of all four parameters is recommended, as shown by theoretical investigations indicating different sensitivities of each parameter, partly depending on population size [50]. Generally, Tajima's  $D$  [51], Fu's  $F_s$  [52], and  $R_s$  [50] indicate whether populations show an excess of singleton mutations, i.e., a pattern expected at neutrally evolving genetic markers if a population is not in mutation-drift equilibrium as a result of expansive population growth. The Ragedness index [53] reflects the mismatch distribution of pairwise nucleotide differences

between haplotypes and is expected to be unimodal under an expansion scenario. Divergence between populations was estimated based on an Analyses of Molecular Variance according to the approach by Weir and Cockerham (1984) [54] and implemented in the software Arlequin [55, 56].

**Coalescent simulations.** Statistical performance analyses can give insights into how many gene fragments may be used in order to get robust estimates into patterns of gene flow. They were conducted by re-estimating demographic parameters using simulated population genetic datasets with controlled parameter values (pseudo-observed datasets). Simulations were completed with *fastsimcoal2* [57] under two different isolation with migration models characterized by symmetrical and asymmetrical migration rates, respectively. A graphical representation of these models can be found in [S1 Fig](#). Pseudo-observed datasets were simulated for 20 diploid individuals per population and with four different lengths of neutral genomic fragments per dataset: 10, 100, 1000, and 10000 ([S2 Table](#)). We assume that dirivultid copepods, as most copepods, are composed of diploid cells [58]. One fragment corresponded to a 600bp region with mutation and recombination rates of  $1 \times 10^{-8}$  events/bp/generation. For each model and for each number of simulated fragments we simulated 20 pseudo-observed datasets that were used as input to the maximum-likelihood parameter estimation procedure implemented in *fastsimcoal2* [9]. In both models the diploid population sizes were set to 10000 individuals and kept constant over time, based on the observed mean abundance of 8 individuals per  $64 \text{ cm}^2$  of *Stygiopontius hispidulus*, *Aphotopontius mammillatus* and *A. limatulus* (see [discussion](#) on diversity below) and assuming a vent field size of  $8 \text{ m}^2$ . Time of divergence ( $T_{\text{DIV}}$ ) was set to 1000 and 100000 generations.  $T_{\text{DIV}}$  of 1000 is an estimate based on presumably high generation time of copepods and recent bottleneck events due to major volcanic eruptions. For  $T_{\text{DIV}} = 1000$  we assume  $\sim 33$  copepod generations per year in an environment with temperatures of  $20^\circ\text{C}$  [59], and major volcanic eruption  $\sim 33$  years ago, a realistic current day scenario for fast spreading centers [27].  $T_{\text{DIV}} = 100\ 000$  is an estimate based on lower generation time (assuming 10 copepod generations per year in an environment of  $10^\circ\text{C}$ ; [59]) and major disturbance event 10 000 years ago. The migration rate was set to 0.0001 and corresponds to the proportion of individuals within a population that belonged to another population in the previous generation. Here the product  $Nm$  equals 1, indicating one migrating individual per generation.

## Results

### Species identification, molecular taxonomy and intraspecific DNA sequence variation

Morphological identification and maximum-likelihood phylogenetic analyses of mitochondrial COI sequences ( $\sim 650$  bp) revealed the same entities and there was no evidence for cryptic species ([Fig 3](#)). Uncorrected p-distances between species ranged from 15 to 28% within the genus *Stygiopontius*, and from 23 to 29% within the genus *Aphotopontius*. Intraspecific p-distance estimates were low for *Stygiopontius spec.* (0.5–1.4%) and *Aphotopontius spec.* (0.8–1.2%) ([Table 2](#)). The maximum-likelihood phylogeny groups all *Stygiopontius* species. *S. lauensis* and *S. brevispina* from ELSC (bootstrap value XY79) from a cluster. *S. sp. 1 nov.*, *S. sp.2 nov.* from CIR from a cluster with *S. pectinatus* from MAR (bootstrap value 76). Haplotype networks of *Stygiopontius* spp. ([Fig 4](#)) and *Aphotopontius* spp. ([Fig 5](#)) indicate that intraspecific nucleotide differences between haplotypes are small and haplotypes are related by only few mutational steps ([Figs 4 and 5](#)). There is no correlation between topology and distribution of haplotypes among localities, and haplotype sharing among localities.



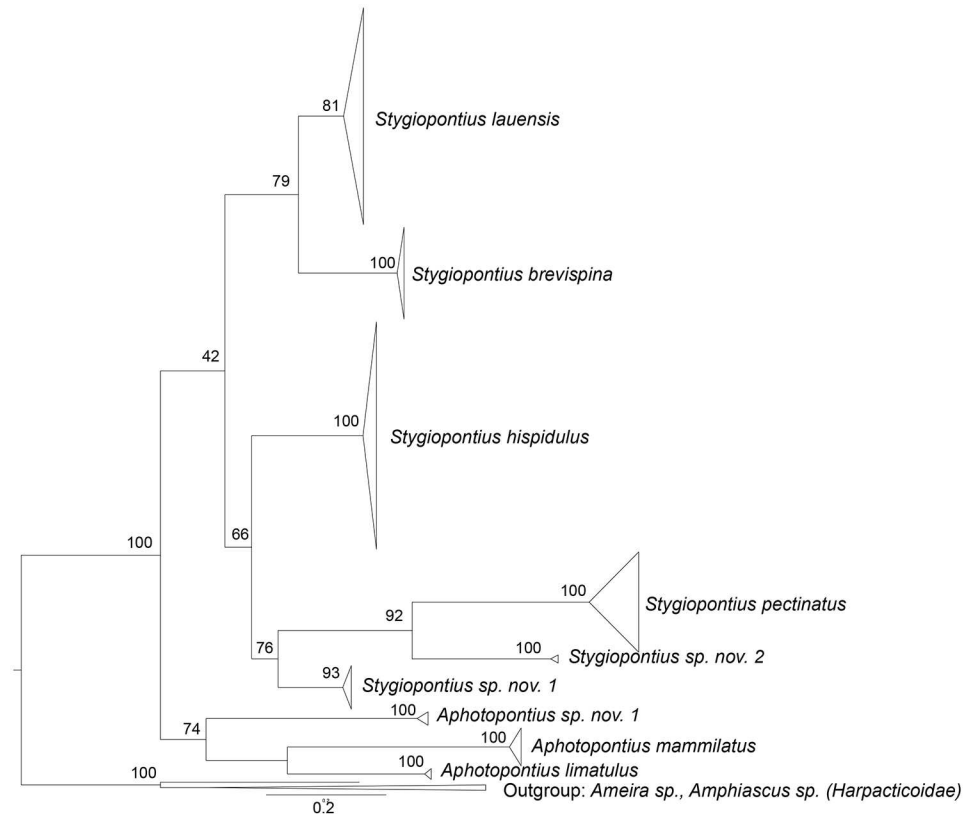

**Fig 3. Maximum-likelihood phylogeny tree, calculated with RAxML tree and 1000 bootstraps, for the nine dirivultid copepod species on the basis of mtCOI data.**

doi:10.1371/journal.pone.0163776.g003

### Diversity and Demography

Diversity and demography parameters were estimated for populations with at least 4 specimens (see Table 1). Haplotype diversity was high among all *Stygiopontius* spp., ranging from 0.893 to

**Table 2. Genetic p-distances referring to taxa and their respective clusters as derived in Maximum-Likelihood phylogenetic inference.**

| Taxon                            | intraspecific p-distances |        |        |        | interspecific p-distances |        |
|----------------------------------|---------------------------|--------|--------|--------|---------------------------|--------|
|                                  | min                       | max    | mean   | SE     | min                       | max    |
| <i>Stygiopontius sp.nov. 1</i>   | 0                         | 0.0136 | 0.0048 | 0.0012 | 0.1784                    | 0.2727 |
| <i>Stygiopontius sp.nov. 2</i>   | 0.0066                    | 0.0148 | 0.0109 | 0.0029 | 0.2049                    | 0.2956 |
| <i>Stygiopontius pectinatus</i>  | 0                         | 0.06   | 0.0103 | 0.0015 | 0.2049                    | 0.3101 |
| <i>Stygiopontius hispidulus</i>  | 0                         | 0.018  | 0.0062 | 0.0015 | 0.1784                    | 0.2877 |
| <i>Stygiopontius lauensis</i>    | 0                         | 0.0319 | 0.0138 | 0.0024 | 0.1461                    | 0.2755 |
| <i>Stygiopontius brevispina</i>  | 0                         | 0.0102 | 0.0051 | 0.0013 | 0.1461                    | 0.2974 |
| <i>Aphotopontius sp.nov. 1</i>   | 0.0016                    | 0.0193 | 0.0108 | 0.0027 | 0.2179                    | 0.2974 |
| <i>Aphotopontius limatulus</i>   | 0.0016                    | 0.0128 | 0.0083 | 0.0025 | 0.2311                    | 0.3101 |
| <i>Aphotopontius mammillatus</i> | 0                         | 0.0313 | 0.0117 | 0.0018 | 0.2311                    | 0.3101 |

Within group (intraspecific) parameter range refers to pairwise p-distance estimates between individual mtCOI-nucleotide sequences. Within group means are given with Standard Error (SE) that was calculated based on 500 bootstrap replicates. Between group (interspecific) means are listed as minimum and maximum mean values and the complete set of pairwise comparisons is given in S3 Table.

doi:10.1371/journal.pone.0163776.t002

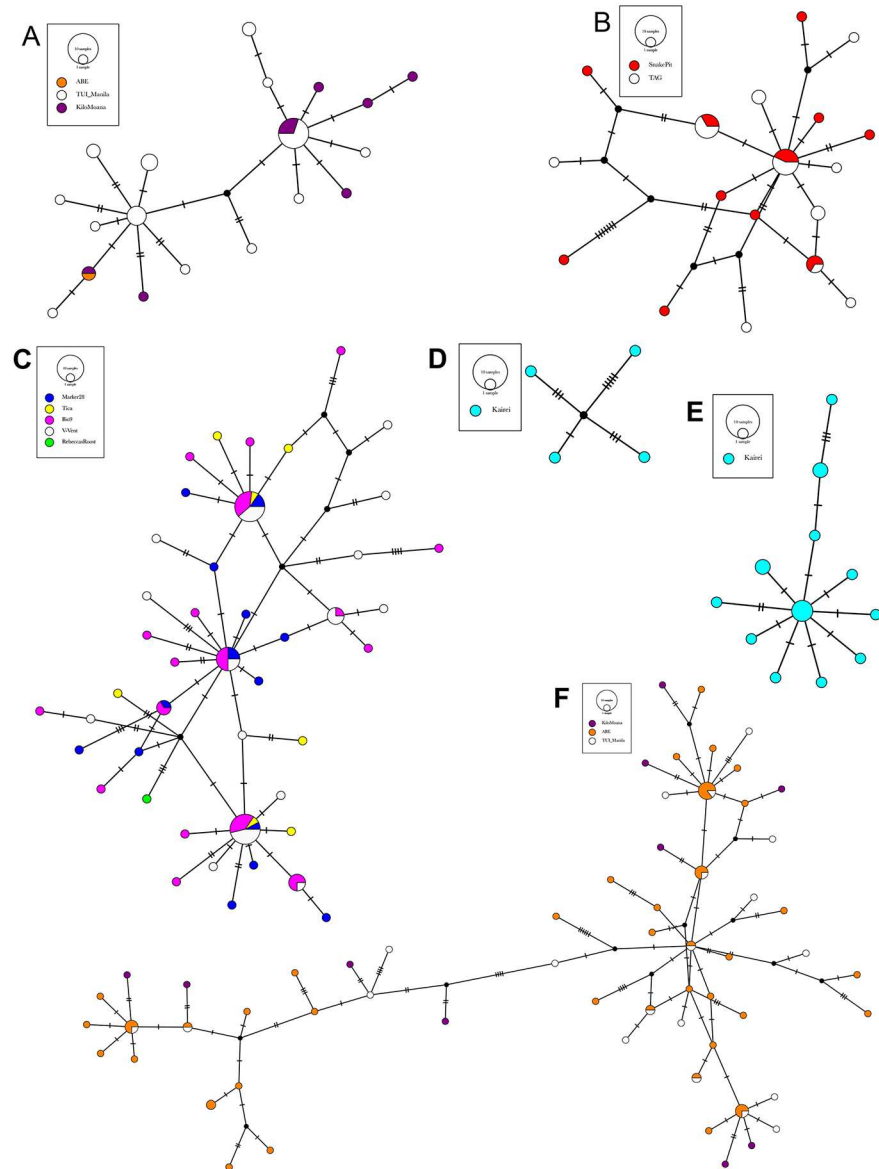

**Fig 4. MtCOI haplotype networks of *Stygiopontius* species based on statistical parsimony.** A. *S. brevispina* (ELSC), B. *S. pectinatus* (MAR), C. *S. hispidulus* (EPR, and one ind. from GC), D. *S. sp. nov. 2* (CIR), E. *S. sp. nov. 1* (CIR), F. *S. lauensis* (ELSC). Species occurred in different regions: Eastern Lau Spreading Center (ELSC), Mid Atlantic Ridge (MAR), East Pacific Rise (EPR), Gulf of California (GC) and Central Indian Ridge (CIR). Distinct haplotypes are depicted as circles (indicating haplotypes found at a single locality) and pie charts (haplotype found at different localities) with a diameter proportional to their frequency among all haplotypes found in each species. A color code indicates the sample site and the frequency distribution (pie charts) of haplotypes for each locality. Circles and pie charts are connected by lines whereas black dots and slashes indicate missing haplotypes (providing a relative estimate of genetic divergence between haplotypes).

doi:10.1371/journal.pone.0163776.g004

1.00 and nucleotide diversity ranged from <0.001 to 0.01 (Table 3) Values for both diversity estimates were in the same range for the three *Aphotopontius* spp. (Hd ranging between 0.8 and 1.0;  $\pi$ : 0.008–0.01) (Table 3). The ratio between nucleotide diversity at non-synonymous and synonymous sites ( $\pi_a/\pi_s$ ) was much less than one for all taxa.

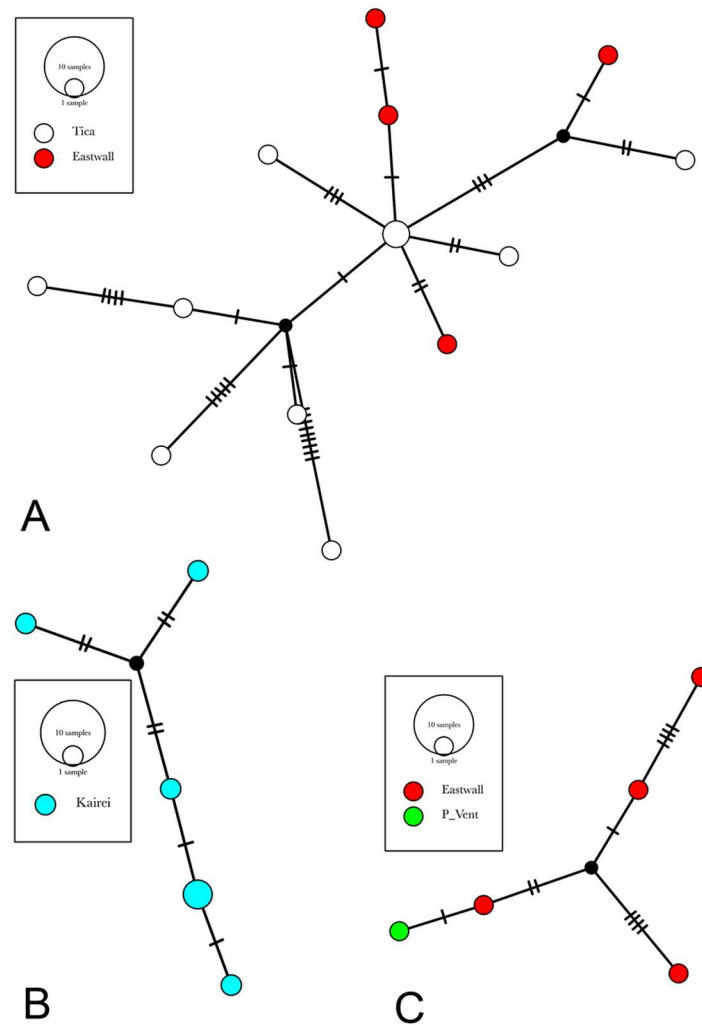

**Fig 5. COI haplotype networks of *Aphotopontius* species based on statistical parsimony.** A. *A. mammillatus* (EPR), B. *A. sp. nov. 1* (CIR), C. *A. limatulus* (EPR). Species occurred in different regions: East Pacific Rise (EPR), and Central Indian Ridge (CIR). Distinct haplotypes are depicted as circles (indicating haplotypes found at a single locality) and pie charts (haplotype found at different localities) with a diameter proportional to their frequency among all haplotypes found in each species. A color code indicates the sample site and the frequency distribution (pie charts) of haplotypes for each locality. Circles and pie charts are connected by lines whereas black dots and slashes indicate missing haplotypes (providing a relative estimate of genetic divergence between haplotypes).

doi:10.1371/journal.pone.0163776.g005

Demography parameter estimates indicated that all populations are undergoing growth (Table 4). Tajima's *D* was always negative, indicating an excess of rare alleles (i.e. singleton mutations), and ranged from -0.8 to -2.1 for *Stygiopontius* spp. from all biogeographic regions. Some of the more extreme values were seen for *S. pectinatus* from MAR (-1.9;  $p < 0.05$ ), for *S. brevispina* from ELSC (-1.8;  $p < 0.05$ ), and for *S. hispidulus* from EPR (-2.1;  $p < 0.05$ ). Similarly, Fu's *F* values were significantly negative, and *R*<sub>2</sub> and raggedness index (*rg*) were low for *Stygiopontius* species, indicating sudden expansion. Similar values (negative Tajima *D* and Fu's *F*; low *R*<sub>2</sub> and *rg*) were observed for *Aphotopontius* species (Table 4). This excess of rare alleles in all taxa is also reflected in haplotypes networks (Figs 4 and 5), which indicate a majority of singleton haplotypes.

**Table 3. Species specific diversity (within populations) and divergence (between populations) parameters estimates based on COI sequences.**

| Species                          | Region | Site           | N <sub>Seq</sub> | Sites <sub>used</sub> /Sites <sub>alignment</sub> | N <sub>Hap</sub> | Hd    | S  | π       | π <sub>a</sub> /π <sub>s</sub> | AMOVA                 |
|----------------------------------|--------|----------------|------------------|---------------------------------------------------|------------------|-------|----|---------|--------------------------------|-----------------------|
| <i>Stygiopontius sp. 1</i>       | CIR    | Kairei         | 17               | 477/625                                           | 12               | 0.941 | 14 | 0.00465 | 0.018                          | -                     |
| <i>Stygiopontius sp. 2</i>       | CIR    | Kairei         | 4                | 540/612                                           | 4                | 1     | 12 | 0.0112  | 0.061                          | -                     |
| <i>Stygiopontius pectinatus</i>  | MAR    | Snake Pit      | 15               | 435/660                                           | 11               | 0.952 | 20 | 0.00893 | 0.064                          | -                     |
|                                  |        | TAG            | 18               | 504/666                                           | 12               | 0.935 | 21 | 0.00695 | 0.033                          | -                     |
|                                  |        | Turtles Pit    | 2                | -                                                 | 2                | 1     | -  | -       | -                              | -                     |
|                                  |        | overall        | 33               | 435/666                                           | 18               | 0.922 | 27 | 0.00723 | 0.04                           | 0.07 (P = 0.051)      |
| <i>Stygiopontius hispidulus</i>  | EPR    | Marker 28      | 16               | 657/657                                           | 14               | 0.983 | 19 | 0.0061  | 0                              | -                     |
|                                  |        | Tica           | 7                | 657/657                                           | 7                | 1     | 11 | 0.00656 | 0.023                          | -                     |
|                                  |        | Bio9           | 32               | 657/657                                           | 19               | 0.946 | 30 | 0.00655 | 0.02                           | -                     |
|                                  |        | V-Vent         | 27               | 655/657                                           | 15               | 0.917 | 22 | 0.00529 | 0                              | -                     |
|                                  |        | Rebeccas Roost | 1                | -                                                 | -                | -     | -  | -       | -                              | -                     |
|                                  |        | overall        | 83               | 655/657                                           | 44               | 0.942 | 52 | 0.00556 | 0.011                          | -0.00141 (P = 0.472)  |
| <i>Stygiopontius lauensis</i>    | ELSC   | ABE            | 50               | 657/657                                           | 40               | 0.985 | 61 | 0.01442 | 0.003                          | -                     |
|                                  |        | TU'i Malila    | 23               | 639/657                                           | 23               | 1     | 38 | 0.0125  | 0                              | -                     |
|                                  |        | Kilo Moana     | 7                | 618/657                                           | 7                | 1     | 26 | 0.01718 | 0.008                          | -                     |
|                                  |        | overall        | 80               | 600/657                                           | 60               | 0.986 | 73 | 0.01483 | 0.003                          | 0.02026 (P = 0.146)   |
| <i>Stygiopontius brevispina</i>  | ELSC   | ABE            | 1                | -                                                 | -                | -     | -  | -       | -                              | -                     |
|                                  |        | TU'i Malila    | 26               | 639/657                                           | 15               | 0.945 | 20 | 0.00514 | 0                              | -                     |
|                                  |        | Kilo Moana     | 8                | 588/657                                           | 6                | 0.893 | 8  | 0.00372 | 0                              | -                     |
|                                  |        | overall        | 35               | 571/657                                           | 19               | 0.906 | 23 | 0.00483 | 0                              | 0.11027 (P = 0.02)    |
| <i>Aphotopontius sp. 1</i>       | ELSC   | Kairei         | 6                | 459/648                                           | 5                | 0.933 | 8  | 0.00731 | 0                              | -                     |
| <i>Aphotopontius limatulus</i>   | EPR    | Kairei         | 6                | 459/648                                           | 5                | 0.933 | 8  | 0.00731 | 0                              | -                     |
|                                  |        | Eastwall       | 4                | 624/669                                           | 4                | 1     | 10 | 0.0086  | 0                              | -                     |
|                                  |        | P-Vent         | 1                | -                                                 | 1                | -     | -  | -       | -                              | -                     |
|                                  |        | overall        | 5                | 624/669                                           | 5                | 1     | 11 | 0.00839 | 0                              | -                     |
| <i>Aphotopontius mammillatus</i> | EPR    | Tica           | 10               | 528/675                                           | 9                | 0.978 | 30 | 0.01281 | 0.269                          | -                     |
|                                  |        | Eastwall       | 4                | 660/675                                           | 4                | 1     | 10 | 0.00788 | 0                              | -                     |
|                                  |        | overall        | 14               | 528/675                                           | 13               | 0.989 | 34 | 0.01161 | 0.18                           | -0.06988 (P = 0.8522) |

Diversity parameters are given for each locality: N<sub>Seq</sub> = Numbers of COI sequences, Sites<sub>used</sub> = Number of sites that are available for each specimen within the alignment, Sites<sub>alignment</sub> = Total length of the alignment, N<sub>Hap</sub> = Number of haplotypes, Hd = Haplotype diversity, S = Number of segregating sites, π = Jukes-Cantor corrected estimate of nucleotide diversity, π<sub>a</sub>/π<sub>s</sub> = ratio of Jukes-Cantor corrected estimates for nucleotide diversity at non-synonymous nucleotide positions (π<sub>a</sub>) and nucleotide diversity at synonymous nucleotide positions (π<sub>s</sub>). Divergence estimates are based on an analysis of molecular variance (AMOVA) and where performed for all species found at different sites (F<sub>st</sub> values with a P-value derived from bootstrapping). Calculation where only performed for sites with at least 4 nucleotide sequences.

doi:10.1371/journal.pone.0163776.t003

### Divergence

AMOVA-based estimates of divergence between populations were made for species that were found at more than one locality (Table 3). We estimate F<sub>ST</sub> as 0.07 (p = 0.05) for *S. pectinatus* from MAR sites (sites > 300 km apart). At ELSC sites, F<sub>ST</sub> was 0.02 (p = 0.15) for *S. lauensis* and 0.11 (p = 0.02) for *S. brevispina*; this includes samples from three vent sites separated by 80 and 140 km. In contrast, EPR vent sites were separated by just a few hundred meters and at most by 5 km, so estimates for *S. hispidulus* were only -0.001 (p = 0.47) (Table 2). Low divergence between sites is also reflected in the haplotype networks (Figs 4 and 5) as there is no association between network topology and sampling locality. Apart from *Stygiopontius* species, divergence estimates were also possible for *Aphotopontius mammillatus* at EPR. Low

**Table 4. Parameters describing demography of species specific populations found at different sites.**

| Species                          | Region | Site           | N <sub>Seq</sub> | N <sub>Hap</sub>   | Tajima D           | Fu Fs*              | R2*                 | rg*                 |
|----------------------------------|--------|----------------|------------------|--------------------|--------------------|---------------------|---------------------|---------------------|
| <i>Stygiopontius sp. 1</i>       | CIR    | Kairei         | 17               | 12                 | -1.786 (n.s.)      | -8.411 (P<0.0001)   | 0.068 (P<0.0001)    | 0.1094 (P = 0.4072) |
| <i>Stygiopontius sp.2</i>        | CIR    | Kairei         | 4                | 4                  | -0.851 (n.s.)      | -0.288 (P = 0.2566) | 0.1179 (P = 0.0275) | 0.6667 (P = 0.7929) |
| <i>Stygiopontius pectinatus</i>  | MAR    | Snake Pit      | 15               | 11                 | -1.6621 (n.s.)     | -4.481 (P = 0.014)  | 0.0946 (P = 0.033)  | 0.0405 (P = 0.1300) |
|                                  |        | TAG            | 18               | 10                 | -1.6851 (n.s.)     | -5.117 (P<0.0001)   | 0.0878 (P = 0.0320) | 0.0356 (P = 0.092)  |
|                                  |        | Turtles Pit    | 2                | -                  | -                  | -                   | -                   | -                   |
|                                  |        | overall        | 33               | 18                 | -1.9359 (P<0.05)   | -10.113 (P<0.0001)  | 0.057 (P = 0.010)   | 0.0335 (P = 0.1170) |
| <i>Stygiopontius hispidulus</i>  | EPR    | Marker 28      | 16               | 14                 | -1.2132 (n.s.)     | -9.291 (P<0.0001)   | 0.0799 (P = 0.003)  | 0.0338 (P = 0.089)  |
|                                  |        | Tica           | 7                | 7                  | -0.2458 (n.s.)     | -3.398 (P = 0.011)  | 0.1423 (P = 0.088)  | 0.0635 (P = 0.0983) |
|                                  |        | Bio9           | 32               | 19                 | -1.6559 (n.s.)     | -8.867 (P = 0.001)  | 0.0678 (P = 0.048)  | 0.0285 (P = 0.114)  |
|                                  |        | V-Vent         | 27               | 15                 | -1.4221 (n.s.)     | -6.431 (P = 0.003)  | 0.0649 (P = 0.011)  | 0.0379 (P = 0.1270) |
|                                  | GC     | Rebeccas Roost | 1                | 1                  | -                  | -                   | -                   | -                   |
| overall                          | 83     | 44             | -2.1433 (P<0.05) | -44.459 (P<0.0001) | 0.0300 (P = 0.001) | 0.0174 (P = 0.030)  |                     |                     |
| <i>Stygiopontius lauensis</i>    | ELSC   | ABE            | 50               | 40                 | -1.1712 (n.s.)     | -26.303 (P<0.0001)  | 0.0677 (P = 0.080)  | 0.0087 (P = 0.023)  |
|                                  |        | TU'i Malila    | 23               | 23                 | -0.8991 (n.s.)     | -18.459 (P<0.0001)  | 0.0852 (P = 0.065)  | 0.0101 (P = 0.011)  |
|                                  |        | Kilo Moana     | 7                | 7                  | -0.2807 (n.s.)     | -1.479 (P = 0.124)  | 0.1271 (P = 0.052)  | 0.0726 (P = 0.2020) |
|                                  |        | overall        | 80               | 60                 | -1.3987 (n.s.)     | -34.502 (P<0.0001)  | 0.0546 (P = 0.057)  | 0.0050 (P = 0.005)  |
| <i>Stygiopontius brevispina</i>  | ELSC   | ABE            | 1                | -                  | -                  | -                   | -                   | -                   |
|                                  |        | TU'i Malila    | 26               | 15                 | -1.3499 (n.s.)     | -7.124 (P = 0.002)  | 0.071 (P = 0.019)   | 0.0395 (P = 0.135)  |
|                                  |        | Kilo Moana     | 8                | 6                  | -1.4213 (n.s.)     | -2.401 (P = 0.016)  | 0.1608 (P = 0.133)  | 0.111 (P = 0.2059)  |
|                                  |        | overall        | 35               |                    | -1.8232 (P<0.05)   | -12.601 (P<0.0001)  | 0.0508 (P = 0.001)  | 0.0257 (P = 0.043)  |
| <i>Aphotopontius sp. 1</i>       | ELSC   | Kairei         | 6                | 5                  | -0.2866 (n.s.)     | -1.082 (P = 0.161)  | 0.1531 (P = 0.677)  | 0.1644 (P = 0.3212) |
| <i>Aphotopontius limatulus</i>   | EPR    | Eastwall       | 4                | 4                  | -0.2223 (n.s.)     | -0.439 (P = 0.2295) | 0.1394 (P = 0.0428) | 0.1667 (P = 0.1294) |
|                                  |        | P-Vent         | 1                | 1                  | -                  | -                   | -                   | -                   |
|                                  |        | overall        | 5                | 5                  | -0.1091 (n.s.)     | -1.283 (P = 0.1168) | 0.1640 (P = 0.1113) | 0.1400 (P = 0.1901) |
| <i>Aphotopontius mammillatus</i> | EPR    | Tica           | 10               | 9                  | -1.8734 (P<0.05)   | -2.683 (P = 0.064)  | 0.0936 (P = 0.014)  | 0.0627 (P = 2760)   |
|                                  |        | Eastwall       | 4                | 4                  | -0.5281 (n.s.)     | -0.480 (P = 0.222)  | 0.1816 (P = 0.1265) | 0.333 (P = 0.483)   |
|                                  |        | overall        | 14               | 13                 | -2.0096 (P<0.05)   | -6.624 (P<0.0001)   | 0.0757 (P = 0.003)  | 0.0315 (P = 0.1090) |

Estimates were performed for site specific population with a minimum size of 4 specimens and estimates are given for four different estimators with p-values given in parentheses. rg = Raggedness index, \*Test for significance based on a coalescence approach using 1000 replicates, assuming no recombination and given the estimate for Theta under the Population growth-decline model as implemented in DNASP; P indicates the probability to observe a value larger or equal to the observed value.

doi:10.1371/journal.pone.0163776.t004

population divergence ( $F_{ST}t = -0.07, p = 0.9$ ) also reflected by the absence of a relationship between network topology and sampling locality.

### Impact of the number of sequenced fragments on the statistical performance of demographic estimations

Figs 6 and 7 summarize the results of the performance analysis of demographic estimations with varying numbers of sequenced fragments and assuming population divergence times ( $T_{DIV}$ ) of 100000 and 1000 generations. Results for  $T_{DIV} = 100000$  show that accurate estimates of the migration rate and the population size can be achieved when the number of simulated fragments is at least 100 both for the symmetrical and asymmetrical migration models. The reason for the low performance in re-estimating the age of the split between the two populations in the asymmetrical migration rate model can be explained by the fact that the time to the most recent common ancestor in the whole sample is probably consistently younger than the

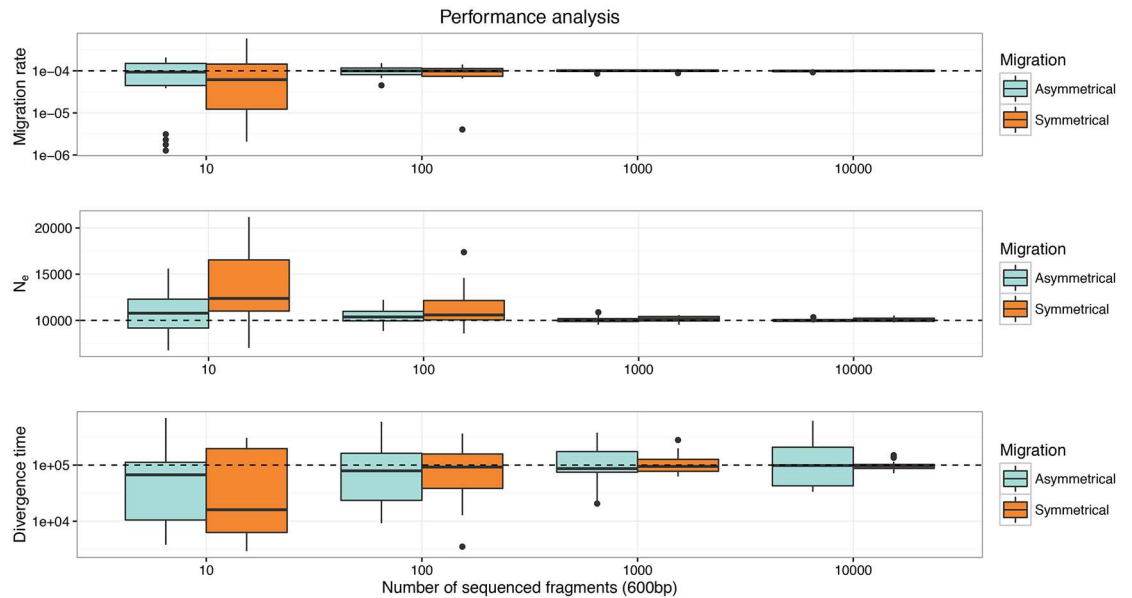

**Fig 6. Performance analyses of *fastsimcoal2* assuming a divergence time ( $T_{DIV}$ ) of 100000 generations for different numbers of sequenced fragments in isolation with migration models.** In every panel the dashed horizontal line represents the true value of the parameter and the boxplots represent 20 re-estimations of these parameters under the correct model.

doi:10.1371/journal.pone.0163776.g006

age of the population split (100000 generations). Analyses with a divergence time of 1000 generations provided similar results: using at least 100 fragments gives good estimates on migration rate although precision in the re-estimation of the migration rate decreased compared to the case where  $T_{DIV} = 100000$  (Figs 6 and 7). Overall, our results show that a dataset composed

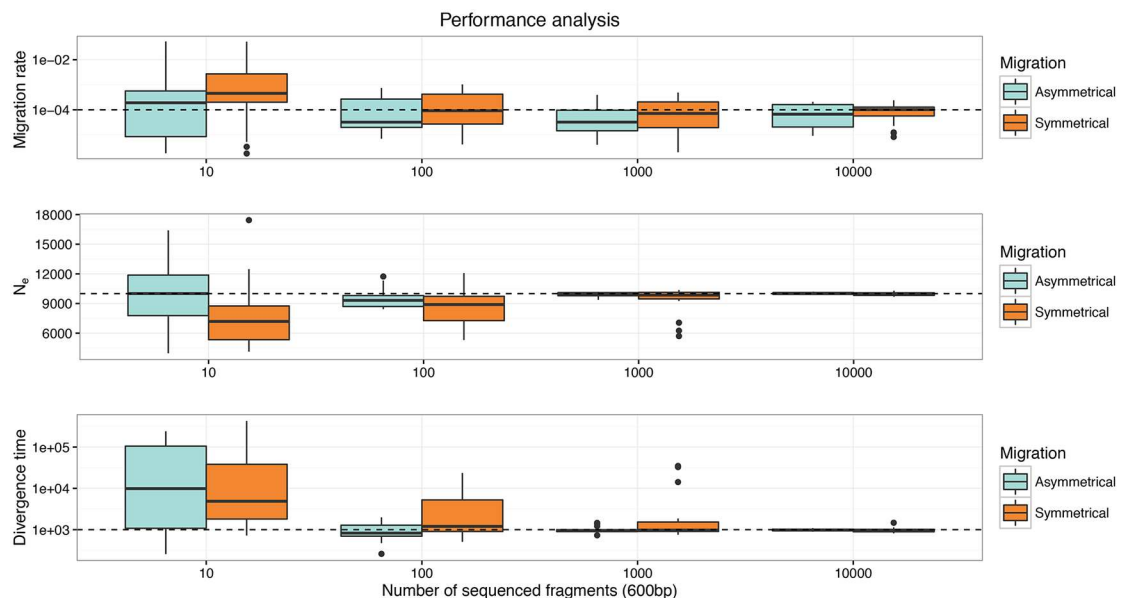

**Fig 7. Performance analyses of *fastsimcoal2* assuming a divergence time ( $T_{DIV}$ ) of 1000 generations for different numbers of sequenced fragments in isolation with migration models.** In every panel the dashed horizontal line represents the true value of the parameter and the boxplots represent 20 re-estimations of these parameters under the correct model.

doi:10.1371/journal.pone.0163776.g007

of 100 fragments sequenced in two population samples of 20 diploid individuals allows gaining insight into patterns of gene flow in these deep sea populations.

## Discussion

### Species identification and molecular taxonomy

Our DNA sequences of dirivultid copepods confirmed the morphologically identified species and showed that mtCOI is a powerful tool to identify dirivultid species. The protocol developed earlier for species from EPR and ELSC [39] worked very well here for species from MAR and CIR. Net distances between newly analyzed dirivultid species were similar to what was observed earlier, and previously morphologically undescribed dirivultid species had similar distances as described ones [39]. Thus, morphological and molecular taxonomy matches very well within Dirivultidae, and there was no indication of cryptic species, as also indicated by the haplotype networks.

### Diversity

High haplotype diversity of dirivultid copepods corresponds to high site occupancy, similar to what was observed for macrofauna species from EPR [14]. Copepod specimens used for mtCOI analyses from 9°N EPR were collected from 2006 to 2009 and come partly from the same collections (often the same sites) as a community recovery of fauna after a major volcanic eruption in this area in 2006 [22]. *Stygiopontius hispidulus*, *Aphotopontius mammillatus*, and *A. limatulus* were present in the majority of these community samples, and were highly abundant locally (e.g. 239 *S. hispidulus* ind. per 64 cm<sup>2</sup> at site Bio 9 in 2006; 124 *A. limatulus* ind. per 64 cm<sup>2</sup> at site Eastwall in 2009; 29 *A. mammillatus* ind. per 64 cm<sup>2</sup> at site Tica in 2009; for mean values see S4 Table). The mean abundance of these three species was 8 ind. per 64 cm<sup>2</sup> (corresponding to the size of artificial settlement device used by Gollner et al. [22]), and thus about 1250 individuals per species per square meter can be expected in this region. Thus, a vent field with a size of ~50 m<sup>2</sup> could harbor more than 60 000 individuals per dirivultid species in this EPR region. Dirivultid species from ELSC were also abundant and inhabited all three sites studied (ongoing study Gollner et al.). *S. pectinatus* from MAR is known to occur in high abundances in close association with the shrimp *Rimicaris exoculata* (pers. obs. Florence Pradillon IFREMER). To conclude, Dirivultids maintain numerous colonies with locally abundant populations, characterized genetically by high haplotype diversity.

Large dirivultid population sizes might be a result of high resource availability at hydrothermal vents. Most dirivultid copepods are deposit feeders and/or graze on the abundant bacterial mats associated with hydrothermal vents [4, 60, 61]. Limen et al. [62] observed that Dirivultids even show food partitioning within the same trophic level [63]. In addition to this nutritional adaptation, dirivultid copepods exhibit high hemoglobin concentrations which may help them to up take oxygen and to thrive in the low oxygen vent environments [64, 65]. Also, they are typically faster and larger than other vent meiofauna [1, 32]. Thus, Dirivultids are highly competitive in the vent environment, which could allow them to take particular advantage of the high food concentrations in the extreme vent environment and hence grow to large population sizes, finally leading to high haplotype diversity.

The copepod species studied here live in close association with highly abundant megafauna that show similarly high haplotype diversity. For example, the copepod *S. pectinatus* is found associated with the shrimp *Rimicaris exoculata*. It lives around and inside the gills of the shrimp and likely grazes on the bacteria farmed there [66, 67]. Haplotype diversity of *R. exoculata* ranged from 0.69 to 0.82 for sample populations with more than 11 individuals, and was similarly high as in *S. pectinatus*, with values of with 0.94 to 1 [15]. The copepod *S. hispidulus*

(hd 0.92–1) is typically found in very high abundance and in association with the pompeii worm *Alvinella pompejana* [33]. Haplotype diversity of the Pompeii worm was also high at 0.91 [68]. *S. lauensis* (Hd 0.98–1) was very abundant amongst the snail *Ifremeria nautilei* (pers. obs. Sabine Gollner) with Hd ranging from 0.61 to 1 [69]. These findings suggest that high site occupancy can result in high haplotype diversity regardless of traits such as size (meiofauna versus megafauna), mobility (e.g. highly mobile copepods in versus limited vagility of *I. nautilei*), larval nutrition (lecitotrophic Dirivultid larvae versus planctotrophic *R. exoculata* larvae), or number of offspring per individual (4 per dirivultid copepod, many for megafauna) [14].

## Genetic Connectivity

We observed similar genetic connectivity within the same genus regardless of distinct field frequency on EPR, ELSC, and MAR. This conclusion was based on divergence estimates derived from our AMOVA analyses, i.e.,  $F_{ST}$  values are generally low and non-significant indicating weak or no divergence between populations at different vent sites. In addition, haplotype networks showed no correlation between topology and distribution of haplotypes, and haplotype sharing among localities, pointing to similar phylogeography of species and unrestricted gene flux during colonization processes. A priori, we had expected that genetic connectivity within dirivultids having similar life history traits is higher at fast-spreading centers with many vent fields (one every 10–20 km) than at slow-spreading centers with few vent fields (one every 100 km) [26]. High vent field frequency supports a larger effective size of a metapopulation and hence the number of colonies that supply migrants [14]. We speculate that connectivity is also influenced by frequency of natural disturbance events: on fast spreading centers, frequent volcanic eruptions might frequently kill entire local populations and thus diminish connectivity, whilst rare volcanic eruptions on slow spreading centers might have very little effect. Thus, the two geological forces of vent field frequency and disturbance rate could act conversely on connectivity of dirivultid populations in slow- and fast-spreading centers, resulting in similar connectivity.

Ocean current regimes also play a crucial role in vent fauna connectivity and dispersal, since larvae typically drift passively. Dirivultids have lectitotrophic nauplii [36, 37] and feeding copepodites that both have been observed in the pelagial above vents [22, 38]. Mullineaux et al. 2005 showed that larval abundances of vent gastropods, polychaetes, a bivalve and a crab were significantly higher on-vent than off-vent at the 9° NEPR, suggesting that larvae may be retained within the valley [70]. Fracture zones may channel deep water currents in such a way that they act as barriers to passive larval drift [71]. For this study, we have too little information to estimate role of current regimes on dirivultid dispersal in the distinct geographical settings. However, hydrodynamic modeling and Lagrangian particle tracking could help to estimate dispersal distances and directions in the future [21].

Connectivity between active vent sites might be also accomplished through the use of intermediate habitats as stepping stones. Vent copepods have been observed, although not frequently, up to 1 kilometer away from the nearest vent [1, 38]. Nematode species typically associated with active vents have also been observed at inactive vent sites lacking vent fluid supply for more than four years [30]. Whether such habitats can support large enough dirivultid populations to substantially contribute to connectivity between vent sites is currently unclear.

Biological traits may also influence species connectivity. High gene flow in the shrimp *Rimicaris exoculata*, even along the slow spreading MAR, was likely related to several phenotypic and life history traits: its very large lecithotrophic eggs, planktotrophic larvae that feed in photic zones, delayed metamorphosis, and active, directed migration [14, 15, 20]. The pompeii worm *Alvinella pompejana* from fast-spreading EPR likely experiences high gene flow rates due to its



lecitotrophic larvae (which arrest development in cold bottom waters), prolonged larval duration and increasing dispersal potential [18, 19, 68, 72]. Studies on larval duration and either potential or realized dispersal of dirivultid copepods are currently lacking, but such studies may help estimate the influence of biological traits on connectivity.

## Demography

The negative Tajima's D values observed in our dataset are consistent with population size expansion, or could reflect the effects of background selection acting on a non-recombining genome [73]. Population expansion among all Dirivultids could be explained by the food-rich vent environment (see [discussion](#) on diversity and population size above), which allows copepods to produce many offspring. Expanding populations could also foster survival in the temporally unstable vent environment. At 9°N EPR local eruptions occur approximately every 15 years [29], and kill almost all fauna in the region [22, 23]. In addition, vent sites frequently veer, often within only a few months or years [74]. This instability could cause frequent local bottlenecks, resulting in decreased genetic variability. However, variability could quickly rebound, given the rapidly expanding copepod populations. Indeed, as many as 30 individuals per 1000 liters was detected at three meters above vent bottom after the volcanic eruption in 2006 [22]. This is even greater than values reported for gastropod and polychaete larvae in the same area at four meters above bottom (ranges from 2–11 ind. per 1000 l) [75]. In addition, meiofauna typically have more generations per year (averaging three) [76]; further, Huntley et al. (1991) found that generation time is a factor of temperature in copepods, recording average generation times of 125 days at 2°C, of 25 days at 15°C, and of only 10 days at 25°C [77]. Temperature was generally hot but also quite variable in the habitats where we sampled, ranging from 14 to 110°C among Pompeii worm collections, for example [33, 78]. Thus, we expect that dirivultid copepods likely show short generation times of several days or weeks. We speculate that dirivultid populations actively invest in expansion and release their offspring into the pelagial to colonize new vents, thus preventing sudden extinction via volcanic eruptions or veining of vent sites.

## Conclusion

Our comparative study suggests that populations of dirivultid copepods show a pattern of generally high haplotype diversity, high connectivity and population expansion, regardless of vent region. On the EPR, high species abundance values in the benthos and in the pelagial support our genetic data. Benthic copepod abundance data from CIR and ELSC are currently being analyzed by TK and SG, with first results (not yet published) implying that these also support our genetic data. Dirivultids maintain numerous colonies in close proximity, with locally abundant populations, allowing them to quickly colonize nascent vents. This could make these copepods rather robust against threats of mineral mining, such as destruction of active vent sites. However, it should be acknowledged that Dirivultids have different, important characteristics compared to other vent copepods and meiofauna taxa [1]. For example, within the meiofauna size class, only dirivultid copepods were observed frequently in the pelagial, while all other meiofauna taxa were rare [22]. We expect that other vent meiofauna taxa will show less connectivity compared to dirivultid copepods.

Our mtDNA results also raised questions that need to be addressed in the future in order to better understand the underlying processes of connectivity and population expansion. Genomic approaches analyzing 100 fragments, as well as current regime studies and studies on life history traits such as larval duration can help to further unravel mechanisms leading to high genetic connectivity in Dirivultids in areas of different vent field frequencies. These more

detailed results will be necessary to the design of deep-sea preserves in areas that are targeted for future mineral mining operations.

## Supporting Information

**S1 Fig. The two demographic models used or the performance analyses.** Both models are characterized by a population size of 10000 diploid individuals, a time of divergence of 100000 and 1000 generations respectively, and a migration rate of 0.0001. The model on the left allows migration to occur at rate 0.0001 in both directions whereas the model on the right only allows migration to occur in a single direction.

(TIF)

**S1 Table. Gen Bank accession number of Dirivultid specimens (mtCOI-nucleotide sequences) used for comparative analyses of genetic structure in hydrothermal vent populations.** All these samples passed i) quality check of Sanger Sequence-Electropherograms, ii) Blast search if reads for artifacts (e.g. human COI), iii) can be unambiguously translated into a COI-amino acid sequence, and iv) clustered in reciprocally monophyletic clades according to their *a priori* classification based on their morphological characters. Sequences that did not fulfill these four criteria were completely excluded. Species name, individual identification number, locality, source, phylogenetic assignment, and usage in population genetics are given.

Genera: *A.*–*Aphotopontius*; *S.*–*Stygiopontius*.

(PDF)

**S2 Table. Simulated datasets that were used as input to the maximum-likelihood parameter estimation procedure implemented in *fastsimcoal2*.** Identification number of simulation (id), divergence time in generations ( $\tau$ ), mutation and recombination rates of  $1 \times 10^{-8}$  events/per bp/ per generation (m), number of individuals per population ( $N_e$ ), number of migrants per generation (migr./gen.), length of loci in base pairs (bp), migration type, number of pseudo observed data (pseu.obs.), and number of replicates per pseudo observed sample (repl.pseu.obs.).

(PDF)

**S3 Table. Average p-distance between taxa (below diagonal) and respective standard error calculations based on 500 bootstrap replicates (above diagonal).**

(PDF)

**S4 Table. Mean copepod abundance per 64 cm<sup>2</sup> in artificial settlement devices used to study recovery of fauna on the 9°N East Pacific Rise after the 2006 eruption.** Site, year of collection, number of samples (n), and species are given. Abundance data from sites Sketchy, P-Vent and Tica were extracted from raw data from Gollner et al. 2015. Data from sites Bio9 and Eastwall are here published for the first time. Information on sampling strategies and methods in Gollner et al. 2013 and Gollner et al. 2015.

(PDF)

## Acknowledgments

We thank Kirsten Irwin for writing assistance. We thank U. Schampera for invitations to cruises on CIR where we collected copepods during exploratory cruises of the BGR (Bundesanstalt fuer Geowissenschaften und Rohstoffe, Hannover). Collections from ELSC were supported by National Science Foundation (NSF) grant 07–32333 from the Division of Ocean Sciences to C. R. Fisher. Collections from EPR were funded by the Austrian FWF (Grant P20190-B17) to M. Bright. Collections from MAR were provided by F. Pradillon and were

made possible by Ifremer and BICOSE cruise 2014. We warmly thank U. Schampera (BGR), C. R. Fisher (PSU), M. Bright (University Vienna), and F. Pradillon (IFREMER) for their generosity to share samples and dive-time, and the crews, pilots and science parties on board of the research cruises for their support during sample collections. Pictures and samples presented in this study from CIR originate from the INDEX exploration project for marine polymetallic sulfides by the Federal Institute for Geosciences and Natural Resources (BGR) on behalf of the German Federal Ministry for Economic Affairs and Energy. Exploration activities are carried out in the framework and under the regulations of an exploration license with the International Seabed Authority.

## Author Contributions

**Conceptualization:** SG PMA HS SL.

**Data curation:** SG HS.

**Formal analysis:** HS SL SG.

**Funding acquisition:** PMA SG.

**Investigation:** SG TCK SK.

**Methodology:** SG HS SL.

**Project administration:** SG.

**Resources:** SG TCK SK PMA.

**Supervision:** SG.

**Validation:** SG HS SL.

**Visualization:** HS SG TCK SL.

**Writing – original draft:** SG HS SL.

**Writing – review & editing:** SG HS SL TCK PMA.

## References

1. Gollner S, Govenar B, Fisher CR, Bright M. Size matters at deep-sea hydrothermal vents: different diversity and habitat fidelity patterns of meio- and macrofauna. *Marine Ecology Progress Series*. 2015; 520:57–66. doi: [10.3354/meps11078](https://doi.org/10.3354/meps11078) PMID: [26166922](https://pubmed.ncbi.nlm.nih.gov/26166922/)
2. Tunnicliffe V. The nature and origin of the modern hydrothermal vent fauna. *PALAIOS*. 1992; 7:338–50.
3. Fisher CR, Takai K, Le Bris N. Hydrothermal vent ecosystems. *Oceanography*. 2007; 20(1):14–23.
4. Van Dover CL. *The ecology of hydrothermal vents*. Princeton New Jersey: Princeton University Press; 2000. 424 p.
5. Gramling C. Seafloor Mining Plan Advances, Worrying Critics. *Science*. 2014; 344:463. doi: [10.1126/science.344.6183.463](https://doi.org/10.1126/science.344.6183.463) PMID: [24786058](https://pubmed.ncbi.nlm.nih.gov/24786058/)
6. Lehmkoester J. *World Ocean Review 3: Marine Resources—Opportunities and Risks*. Hamburg, Germany: maribus GmbH; 2014. 165 p.
7. Van Dover CL. Impacts of anthropogenic disturbances at deep-sea hydrothermal vent ecosystems: A review. *Marine Environmental Research*. 2014. <http://dx.doi.org/10.1016/j.marenvres.2014.03.008>. doi: [10.1016/j.marenvres.2014.03.008](https://doi.org/10.1016/j.marenvres.2014.03.008) PMID: [24725508](https://pubmed.ncbi.nlm.nih.gov/24725508/)
8. Boschen RE, Rowden AA, Clark MR, Gardner JPA. Mining of deep-sea seafloor massive sulfides: A review of the deposits, their benthic communities, impacts from mining, regulatory frameworks and management strategies. *Ocean & Coastal Management*. 2013; 84:54–67.

9. Excoffier L, Dupanloup I, Huerta-Sanchez E, Sousa VC, Foll M. Robust demographic inference from genomic and SNP data. *PLoS genetics*. 2013; 9(e1003905). doi: [10.1371/journal.pgen.1003905](https://doi.org/10.1371/journal.pgen.1003905) PMID: [24204310](https://pubmed.ncbi.nlm.nih.gov/24204310/)
10. Laurent S, Pfeifer SP, Settles ML, Hunter SS, Hardwick KM, Ormond L, et al. The population genomics of rapid adaptation: disentangling signatures of selection and demography in white sands lizards. *Molecular ecology*. 2016; 25:306–23. doi: [10.1111/mec.13385](https://doi.org/10.1111/mec.13385) PMID: [26363411](https://pubmed.ncbi.nlm.nih.gov/26363411/)
11. Sousa V, Hey J. Understanding the origin of species with genome-scale data: modelling gene flow. *Nature reviews*. 2013; *Genetics*(14):404–14. doi: [10.1038/nrg3446](https://doi.org/10.1038/nrg3446) PMID: [23657479](https://pubmed.ncbi.nlm.nih.gov/23657479/)
12. Loewe WH, Allendorf FW What can genetics tell us about population connectivity? *Molecular ecology*. 2010; 19:3038–51. doi: [10.1111/j.1365-294X.2010.04688.x](https://doi.org/10.1111/j.1365-294X.2010.04688.x) PMID: [20618697](https://pubmed.ncbi.nlm.nih.gov/20618697/)
13. Kahilainen A, Puurtinen M, Kotiaho JS. Conservation implications of species—genetic diversity correlations. *Global Ecology and Conservation* 2014; 2:315–23.
14. Vrijenhoek RC. Genetic diversity and connectivity of deep-sea hydrothermal vent metapopulations. *Molecular ecology*. 2010; 19:4391–411. doi: [10.1111/j.1365-294X.2010.04789.x](https://doi.org/10.1111/j.1365-294X.2010.04789.x) PMID: [20735735](https://pubmed.ncbi.nlm.nih.gov/20735735/)
15. Teixeira S, Cambon-Bonavita M-A, Serrão EA, Desbruyeres D, Arnaud-Haond S. Recent population expansion and connectivity in the hydrothermal shrimp *Rimicaris exoculata* along the Mid-Atlantic Ridge. *Journal of Biogeography*. 2010:1–11. doi: [10.1111/j.1365-2699.2010.02408.x](https://doi.org/10.1111/j.1365-2699.2010.02408.x)
16. Beedesse G, Watanabe H, Ogura T, Nemoto S, Yahagi T, Nakagawa S, et al. High Connectivity of Animal Populations in Deep-Sea Hydrothermal Vent Fields in the Central Indian Ridge Relevant to Its Geological Setting. *Plos one*. 2013; 8(12):e81570. doi: [10.1371/journal.pone.0081570](https://doi.org/10.1371/journal.pone.0081570) PMID: [24358117](https://pubmed.ncbi.nlm.nih.gov/24358117/)
17. Breusing C, Johnson SB, Tunnicliffe V, Vrijenhoek RC. Populations structure and connectivity in Indo-Pacific deep-sea mussels of the *Bathymodiolus septemdirum* complex. *Conservation genetics* 2015; 16:1415–30.
18. Plouviez S, Shank TM, Faure B, Danguin-Thiebaut C, Viard F, Lallier FH, et al. Comparative phylogeography among hydrothermal vent species along the East Pacific Rise reveals vicariant processes and population expansion in the South. *Molecular ecology*. 2009; 18:3903–17. doi: [10.1111/j.1365-294X.2009.04325.x](https://doi.org/10.1111/j.1365-294X.2009.04325.x) PMID: [19709370](https://pubmed.ncbi.nlm.nih.gov/19709370/)
19. Jollivet D, Desbruyères D, Moraga D, Bonhomme F. Genetic differentiation of deep-sea hydrothermal vent alvinellid populations (Annelida: Polychaeta) along the East Pacific Rise. *Heredity*. 1995; 74:376–91.
20. Teixeira S, Serrão EA, Arnaud-Haond S. Panmixia in a Fragmented and Unstable Environment: The Hydrothermal Shrimp *Rimicaris exoculata* Disperses Extensively along the Mid-Atlantic Ridge. *PLoS ONE* 2012; 7(6):e38521. doi: [10.1371/journal.pone.0038521](https://doi.org/10.1371/journal.pone.0038521) PMID: [22679511](https://pubmed.ncbi.nlm.nih.gov/22679511/)
21. Hilário A, Metaxas A, Gaudron SM, Howell KL, Mercier A, Mestre NC, et al. Estimating dispersal distance in the deep sea: challenges and applications to marine reserves. *Frontiers in Marine Science*. 2015; 2(6):1–14. doi: [10.3389/fmars.2015.00006](https://doi.org/10.3389/fmars.2015.00006)
22. Gollner S, Govenar B, Martinez Arbizu P, Mills S, Le Bris N, Weinbauer M, et al. Differences in recovery between deep-sea hydrothermal vent and vent-proximate communities after a volcanic eruption. *Deep-Sea Research I*. 2015; 106:167–82. <http://dx.doi.org/10.1016/j.dsr.2015.10.008>.
23. Shank TM, Fornari DJ, Von Damm KL, Haymon RM, Lutz RA. Temporal and spatial patterns of biological community development at nascent deep-sea hydrothermal vents (9°50'N, East Pacific Rise). *Deep-Sea Research Part II*. 1998; 45:465–515.
24. Tunnicliffe V, Embley RW, Holden JF, Butterfield DA, Massoth GJ, Juniper SK. Biological colonization of new hydrothermal vents following an eruption on Juan de Fuca Ridge. *Deep-Sea Research I*. 1997; 44:1627–44.
25. Mullineaux LS, Adams DK, Mills SW, Beaulieu SE. Larvae from afar colonize deep-sea hydrothermal vents after a catastrophic eruption. *PNAS*. 2010; 107(17):7829–34. doi: [10.1073/pnas.0913187107](https://doi.org/10.1073/pnas.0913187107) PMID: [20385811](https://pubmed.ncbi.nlm.nih.gov/20385811/)
26. Beaulieu SE, Baker ET, German CR. Where are the undiscovered hydrothermal vents on oceanic spreading ridges? *Deep Sea Res II*. 2015; 121:202–12. <http://dx.doi.org/10.1016/j.dsr2.2015.05.001>.
27. Rubin KH, Soule SA, Chadwick WW Jr., Fornari DJ, Clague DA, Embley RW, et al. Volcanic eruptions in the deep sea. *Oceanography*. 2012; 25(1):142–57. <http://dx.doi.org/10.5670/oceanog.2012.12>.
28. Carbotte SM, Macdonald KC. East Pacific Rise 8°–10°30'N; Evolution of ridge segments and discontinuities from SeaMARC II and three-dimensional magnetic studies. *Journal of Geophysical Research*. 1994; 97:6959–82.
29. Tolstoy M, Cowen JP, Baker ET, Fornari DJ, Rubin KH, Shank TM, et al. A sea-floor spreading event captured by seismometers. *Science*. 2006; 314:1920–2. doi: [10.1126/science.1133950](https://doi.org/10.1126/science.1133950) PMID: [17124289](https://pubmed.ncbi.nlm.nih.gov/17124289/)

30. Gollner S, Miljutina M, Bright M. Nematode succession at deep-sea hydrothermal vents after a recent volcanic eruption with the description of two dominant species. *Organisms Diversity & Evolution*. 2013; 13:349–71. doi: [10.1007/s13127-012-0122-2](https://doi.org/10.1007/s13127-012-0122-2)
31. Moalic Y, Desbruyeres D, Duarte CM, Rozenfeld AF, Bachraty C, Arnaud-Haond S. Biogeography revisited with network theory: retracting the history of hydrothermal vent communities. *Systematic Biology*. 2012; 61(1):127–37. doi: [10.1093/sysbio/syr088](https://doi.org/10.1093/sysbio/syr088) PMID: [21856628](https://pubmed.ncbi.nlm.nih.gov/21856628/)
32. Desbruyères D, Segonzac M., Bright M. Handbook of hydrothermal vent fauna. Linz: Denisia; 2006.
33. Gollner S, Riemer B, Martínez Arbizu P, Le Bris N, Bright M. Diversity of Meiofauna from the 9°50'N East Pacific Rise across a Gradient of Hydrothermal Fluid Emissions. *PLoS ONE* 5(8): e12321. 2010. doi: [10.1371/journal.pone.0012321](https://doi.org/10.1371/journal.pone.0012321) PMID: [20856898](https://pubmed.ncbi.nlm.nih.gov/20856898/)
34. Cuvelier D, Beesau J, Ivanenko VN, Zeppilli D, Sarradin P-M, Sarrazin J. First insights into macro- and meiofaunal colonisation patterns on paired wood/slate substrata at Atlantic deep-sea hydrothermal vents. *Deep-Sea Research I*. 2014. doi: [10.1016/j.dsr.2014.02.008](https://doi.org/10.1016/j.dsr.2014.02.008)
35. Gollner S, Ivanenko VI, Martínez Arbizu P, Bright M. Advances in taxonomy, ecology, and biogeography of Dirivultidae (Copepoda) associated with chemosynthetic environments in the deep sea. *PLoS ONE*. 2010; 5(8): e9801. doi: [10.1371/journal.pone.0009801](https://doi.org/10.1371/journal.pone.0009801) PMID: [20838422](https://pubmed.ncbi.nlm.nih.gov/20838422/)
36. Ivanenko VN. Deep-sea hydrothermal vent copepoda (Siphonostomatoidea, Dirivultidae) in plankton over the Mid-Atlantic Ridge (29°N), morphology of their first copepodid stage. *Zoologicheskii Zhurnal* 1998; 77(1):1249–56.
37. Ivanenko VN, Martínez Arbizu P, Stecher J. Lecithotrophic nauplius of the family Dirivultidae (Copepoda; Siphonostomatoidea) hatched on board over the Mid-Atlantic Ridge (5°S). *Marine Ecology*. 2007; 28(49–53).
38. Plum C, Pradillon F, Fujiwara Y, Sarrazin J. Copepod colonization of organic and inorganic substrata at a deep-sea hydrothermal vent site on the Mid-Atlantic Ridge. *Deep Sea Research II*. accepted.
39. Gollner S, Fontaneto D, Martínez Arbizu P. Molecular taxonomy confirms morphological classification of deep-sea hydrothermal vent copepods (Dirivultidae) and suggests broad physiological tolerance of species and frequent dispersal along ridges. *Marine Biology*. 2011; 158:221–31.
40. Gerdes K, Kihara TC. Catalogue of INDEX 2013 Benthic Fauna: Indian Ocean exploration for seafloor massive sulfides—INDEX 2013 with R/V Sonne (SOIndex2013), 23.10–21.12.2013 Port Hedland, Australia—Port Louis, Mauritius. 2013.
41. Folmer O, Black M, Hoeh W, Lutz R, Vrijenhoek R. DNA primers for amplification of mitochondrial cytochrome c oxidase subunit I from diverse metazoan invertebrates. *Molecular Marine Biological Biotechnology*. 1994; 3:294–9. PMID: [7881515](https://pubmed.ncbi.nlm.nih.gov/7881515/)
42. Hall TA. BioEdit a user-friendly biological sequence alignment editor and analysis editor program for Windows 95/98/NT. *Nucleic Acids Symposium Series*. 1999; 41:95–8.
43. Abascal F, Zardoya R, Telford MJ. TranslatorX: multiple alignment of nucleotide sequences guided by amino acid translations *Nucleic Acids Research*. 2010; 38:W7–13. doi: [10.1093/nar/gkq291](https://doi.org/10.1093/nar/gkq291) PMID: [20435676](https://pubmed.ncbi.nlm.nih.gov/20435676/)
44. Edgar RC. MUSCLE: multiple sequence alignment with high accuracy and high throughput. *Nucleic Acid Research* 2004; 32:1792–7. doi: [10.1093/nar/gkh340](https://doi.org/10.1093/nar/gkh340) PMID: [15034147](https://pubmed.ncbi.nlm.nih.gov/15034147/)
45. Tamura K, Peterson D, Peterson N, Stecher G, Nei M, Kumar S. MEGA5: Molecular Evolutionary Genetics Analysis Using Maximum Likelihood, Evolutionary Distance, and Maximum Parsimony Methods. *Molecular Biology and Evolution*. 2011; 28(10):2731–9. <http://doi.org/10.1093/molbev/msr121>. doi: [10.1093/molbev/msr121](https://doi.org/10.1093/molbev/msr121) PMID: [21546353](https://pubmed.ncbi.nlm.nih.gov/21546353/)
46. Clement M, Posada D, Crandall KA. TCS: a computer program to estimate gene genealogies. *Mol Ecol* 2000; 9:1657–9. PMID: [11050560](https://pubmed.ncbi.nlm.nih.gov/11050560/)
47. Clement M, Snell Q, Walker P, Posada D, Crandall K. TCS: Estimating gene genealogies. *Parallel and Distributed Processing Symposium, International Proceedings*. 2002; 2:184.
48. Librado P, Rozas J. DnaSP v5: A software for comprehensive analysis of DNA polymorphism data. *Bioinformatics*. 2009; 25:1451–2. doi: [10.1093/bioinformatics/btp187](https://doi.org/10.1093/bioinformatics/btp187) PMID: [19346325](https://pubmed.ncbi.nlm.nih.gov/19346325/)
49. Nei M. *Molecular evolutionary genetics*. Columbia University Press, New York; 1987.
50. Ramos-Onsins SE, Rozas J. Statistical Properties of New Neutrality Tests Against Population Growth. *Mol Biol Evol* 2002; 19(12):2092–100. PMID: [12446801](https://pubmed.ncbi.nlm.nih.gov/12446801/)
51. Tajima F. Statistical methods for testing the neutral mutation hypothesis by DNA polymorphism. *Genetics*. 1989; 123(3):585–95. PMID: [2513255](https://pubmed.ncbi.nlm.nih.gov/2513255/)
52. Fu XY. Statistical tests of neutrality of mutations against population growth, hitch-hiking, and background selection. *Genetics* 1997; 147:915–25. PMID: [9335623](https://pubmed.ncbi.nlm.nih.gov/9335623/)

53. Harpending HC, Sherry ST, Rogers AR. Genetic Structure of ancient human populations. *Current Anthropology*. 1993; 34:483–96.
54. Weir BS, Cockerham CC. Estimating F-statistics for the analysis of population structure. *Evolution*. 1984; (38):1358–70.
55. Excoffier L, Laval G, Schneider S. Arlequin ver. 3.0: An integrated software package for population genetics data analysis. *Evolutionary Bioinformatics Online*. 2005; 1:47. PMID: [19325852](#)
56. Excoffier L, Smouse P, Quattro J. Analysis of molecular variance inferred from metric distances among DNA haplotypes: Application to human mitochondrial DNA restriction data. *Genetics*. 1992; 131:479–91. PMID: [1644282](#)
57. Excoffier L, Foll M. fastsimcoal: a continuous-time coalescent simulator of genomic diversity under arbitrarily complex evolutionary scenarios. *Bioinformatics*. 2011; 27:1332–4. doi: [10.1093/bioinformatics/btr124](#) PMID: [21398675](#)
58. Gregory TR, Hebert PDN, Kolas J. Evolutionary implications of the relationship between genome size and body size in flatworms and copepods. *Heredity* 2000; 84:201–8. PMID: [10762390](#)
59. Huntley ME, Lopez MDG. Temperature-Dependent Production of Marine Copepods: A Global Synthesis. *The American Naturalist*. 1992; 140(2):201–42. doi: [10.1086/285410](#) PMID: [19426057](#)
60. Heptner MV, Ivanenko VN. Copepoda (Crustacea) of hydrothermal ecosystems of the World Ocean. *Arthropoda Selecta*. 2002; 11(2):117–34.
61. Gollner S, Zekely J, VanDover CL, Govenar B, LeBris N, Nemeschkal H, et al. Benthic copepod communities associated with tubeworm and mussel aggregations on the East Pacific Rise. *Cahiers de Biologie Marine*. 2006; 47:397–402.
62. Limen H, Stevens CJ, Bourass Z, Juniper SK. Trophic ecology of siphonostomatoid copepods at deep-sea hydrothermal vents in the northeast Pacific. *Marine Ecology Progress Series*. 2008; 359:161–70.
63. Limén H, Stevens CJ, Bourass Z, Juniper SK. Trophic ecology of siphonostomatoid copepods at deep-sea hydrothermal vents in the northeast Pacific. *Marine Ecology Progress Series*. 2008; 359:161–70.
64. Hourdez S, Lamontagne J, Peterson P, Weber RE, Fisher CR. Hemoglobin from a deep-sea hydrothermal-vent copepod. *Biological Bulletin*. 2000; 199:95–9. PMID: [11081707](#)
65. Sell AF. Life in the extreme environment at a hydrothermal vent: haemoglobin in a deep-sea copepod. *Proceedings of the Royal Society London*. 2000; 267:2323–36. doi: [10.1098/rspb.2000.1286](#) PMID: [11413650](#)
66. Zbinden M, Le Bris N, Gaill F, Compère P. Distribution of bacteria and associated minerals in the gill chamber of the vent shrimp *Rimicaris exoculata* and related biogeochemical processes. *Marine Ecology Progress Series*. 2004; 284:237–51.
67. Humes AG. Deep-sea Copepoda (Siphonostomatoida) from hydrothermal sites on the Mid-Atlantic Ridge at 23°N and 37°N. *Bulletin of Marine Science*. 1996; 58(3):609–53.
68. Hurtado LA, Lutz RA, Vrijenhoek RC. Distinct patterns of genetic differentiation among annelids of the Eastern Pacific hydrothermal vents. *Molecular Ecology*. 2004; 13:2603–15. doi: [10.1111/j.1365-294X.2004.02287.x](#) PMID: [15315674](#)
69. Thaler AD, Zelnio K, Saleu W, Schultz TF, Carlsson J, Cunningham C, et al. The spatial scale of genetic subdivision in populations of *Ifremeria nautilei*, a hydrothermal vent gastropod from the southwest Pacific. *BMC Evolutionary Biology* 2011; 11:372. doi: [10.1186/1471-2148-11-372](#) PMID: [22192622](#)
70. Mullineaux LS, Mills SW, Sweetman AK, Beaudreau AH, Metaxas A, Hunt HL. Vertical, lateral and temporal structure in larval distributions at hydrothermal vents. *Marine Ecology Progress Series*. 2005; 293:1–16.
71. Mullineaux LS, France S. Dispersal mechanisms of deep-sea hydrothermal vent fauna. In: Humphris SE, Zierenberg RA, Mullineaux LS, Thompson RE, editors. *Seafloor hydrothermal systems: physical, chemical, biological, and geological interactions*. Washington DC 1995. 408–24 p.
72. Pradillon F, Shillito B, Young CM, Gaill F. Developmental arrest in vent worm embryos. *Nature*. 2001; 413:698–9. doi: [10.1038/35099674](#) PMID: [11607020](#)
73. Ewing GB, Jensen JD. Detecting selection in natural populations: making sense of genome scans and towards alternative solutions. The consequences of not accounting for background selection in demographic inference. *Molecular ecology*. 2016; 25:135–41. doi: [10.1111/mec.13390](#)
74. Klose J, Polz MF, Wagner M, Schimak MP, Gollner S, Bright M. Endosymbionts escape dead hydrothermal vent tubeworms to enrich the free-living population. *PNAS*. 2015; 112:1–6. [www.pnas.org/cgi/doi/10.1073/pnas.1501160112](http://www.pnas.org/cgi/doi/10.1073/pnas.1501160112). doi: [10.1073/pnas.1501160112](#) PMID: [26283348](#)

75. Beaulieu SE, Mullineaux LS, Adams DK, Mills SW. Comparison of a sediment trap and plankton pump for timeseries sampling of larvae near deep-sea hydrothermal vents. *Limnology and Oceanography*. 2009; *Methods* 7:235–48.
76. Gerlach SA. On the importance of marine meiofauna for benthos communities. *Oecologia*. 1971; 6:176–90.
77. Huntley ME, Lopez MDG. Temperature-Dependent Production of Marine Copepods: A Global Synthesis. *The American Naturalist*. 1991; 140(2):201–42. doi: [10.1086/285410](https://doi.org/10.1086/285410) PMID: [19426057](https://pubmed.ncbi.nlm.nih.gov/19426057/)
78. Le Bris N, Gaill F. How does the annelid *Alvinella Pompejana* deal with an extreme hydrothermal environment? *Reviews in Environmental Science and Biotechnology*. 2007; 6:167–221.
